# Supplementary material
Source: HighWire-hosted journal article supplement (https://mentalhealth.bmj.com/content/26/1/e300665)
Supplement: inline-supplementary-material-2 [file inline-supplementary-material-2.pdf]

Supplementary Material 2

SEM Output

|                    | Processing Speed |     |       |      |     |
|--------------------|------------------|-----|-------|------|-----|
|                    | B                | SE  | z     | CI   |     |
| CES-D score        | .02              | .04 | .38   | -.06 | .09 |
| Insulin resistance | .05              | .04 | 1.28  | -.03 | .13 |
| Education          | -.02             | .04 | -.48  | -.10 | .06 |
| Age                | .06              | .04 | 1.49  | -.02 | .14 |
| Sex                | -.04             | .04 | -.90  | -.11 | .04 |
|                    |                  |     |       |      |     |
|                    | Delayed Recall   |     |       |      |     |
| CESD score         | .07              | .04 | 1.92  | .00  | .15 |
| Insulin resistance | .00              | .04 | .09   | -.07 | .08 |
| Education          | -.05             | .04 | -1.36 | -.13 | .02 |
| Age                | .09*             | .04 | 2.40  | .02  | .16 |
| Sex                | .30***           | .04 | 8.29  | .23  | .37 |
|                    |                  |     |       |      |     |
|                    | 4 Mountains Task |     |       |      |     |

|                    |                                  |     |       |      |      |
|--------------------|----------------------------------|-----|-------|------|------|
| CESD score         | .14**                            | .05 | 3.06  | .05  | .23  |
| Insulin resistance | .03                              | .05 | .53   | -.07 | .12  |
| Education          | -.12*                            | .05 | -2.52 | -.21 | -.03 |
| Age                | .02                              | .05 | .50   | -.07 | .12  |
| Sex                | -.05                             | .05 | -.97  | -.14 | .05  |
|                    |                                  |     |       |      |      |
|                    | <b>Executive Function</b>        |     |       |      |      |
| CESD score         | -.03                             | .04 | -.82  | -.11 | .05  |
| Insulin resistance | -.12**                           | .04 | -2.95 | -.20 | -.04 |
| Education          | .19***                           | .05 | 4.07  | .10  | .28  |
| Age                | -.01                             | .04 | -.36  | -.09 | .06  |
| Sex                | -.31***                          | .05 | -6.20 | -.41 | -.21 |
|                    |                                  |     |       |      |      |
|                    | <b>Within-person Variability</b> |     |       |      |      |
| CESD score         | .02                              | .04 | .35   | -.07 | .10  |
| Insulin resistance | .05                              | .05 | 1.12  | -.04 | .14  |

|             |                    |     |      |      |     |
|-------------|--------------------|-----|------|------|-----|
| Education   | -.04               | .04 | -.96 | -.13 | .04 |
| Age         | .12**              | .04 | 2.75 | .03  | .20 |
| Sex         | -.04               | .04 | -.85 | -.12 | .05 |
|             |                    |     |      |      |     |
|             | Insulin Resistance |     |      |      |     |
| CES-D score | .15***             | .04 | 4.03 | .08  | .23 |
